# Supplementary material for: Development and Validation of Dietary Behavior Inventory—Surgery (DBI-S) in the Scope of International Post-Bariatric Surgery Guidelines and Recommendations
Source: MDPI journal article supplement (doi:10.3390/nu14183692), 2022-09-07
Supplement: s1 [file s1]

**Table S1.** Items and Scoring of the Dietary Behaviour Inventory-Surgery (DBI-S)

| Item Code | Behavior A                                                                                                                                                     | Scoring |   |   |   |   | Behavior B                                                                                                                                                               |
|-----------|----------------------------------------------------------------------------------------------------------------------------------------------------------------|---------|---|---|---|---|--------------------------------------------------------------------------------------------------------------------------------------------------------------------------|
| DBI-S1    | Ich esse immer in Ruhe, ohne dass ich von irgendetwas abgelenkt werde.                                                                                         | 5       | 4 | 3 | 2 | 1 | Während des Essens beschäftige ich mich immer mit anderen Themen (z.B. Fernsehen, Gedanken an die Arbeit, Lesen).                                                        |
| DBI-S2*   | Ich nehme über den ganzen Tag verteilt 3-4 kleine Mahlzeiten mit ausreichenden Essenspausen zu mir.                                                            | 5       | 4 | 3 | 2 | 1 | Ich nehme über den Tag verteilt weniger, dafür aber größere Mahlzeiten zu mir.                                                                                           |
| DBI-S3*   | Beim ersten Anzeichen einer Sättigung höre ich auf zu Essen.                                                                                                   | 5       | 4 | 3 | 2 | 1 | Ich esse weiter, auch wenn ich eigentlich schon satt bin.                                                                                                                |
| DBI-S4    | Bei der Einnahme meiner Mahlzeiten lasse ich mir immer Zeit.                                                                                                   | 5       | 4 | 3 | 2 | 1 | Meine Mahlzeiten nehme ich immer schnell ein.                                                                                                                            |
| DBI-S5    | Beim Essen nehme ich kleine Bissen, die ich lange durchkaue.                                                                                                   | 5       | 4 | 3 | 2 | 1 | Ich nehme beim Essen große Bissen, die ich nur kurz kaue.                                                                                                                |
| DBI-S6    | Ich halte immer Getränkepause vor den Mahlzeiten (15 Minuten) und nach den Mahlzeiten (30 Minuten) ein.                                                        | 5       | 4 | 3 | 2 | 1 | Ich nehme während der Mahlzeiten Getränke zu mir.                                                                                                                        |
| DBI-S7    | Ich nehme täglich mindestens 1,5 Liter Flüssigkeit (ausgenommen alkoholische Getränke bzw. zucker-/süßungsmittelhaltige/ kohlen säurehaltige Getränke) zu mir. | 5       | 4 | 3 | 2 | 1 | Ich nehme täglich deutlich weniger als 1,5 Liter Flüssigkeit (ausgenommen alkoholische Getränke bzw. zucker-/süßungsmittelhaltige/ kohlen säurehaltige Getränke) zu mir. |
| DBI-S8*   | Ich esse täglich eiweißreiche Lebensmittel (Soja-Produkte, Eier, Linsen, Hülsenfrüchte, Milchprodukte, Fleisch, Fisch).                                        | 5       | 4 | 3 | 2 | 1 | Ich esse nie eiweißreiche Lebensmittel (Soja-Produkte, Eier, Linsen, Hülsenfrüchte, Milchprodukte, Fleisch, Fisch).                                                      |
| DBI-S9    | Ich nehme täglich und in empfohlener Menge ein hochwertiges Eiweißpräparat zu mir.                                                                             | 5       | 4 | 3 | 2 | 1 | Ich nehme nie Eiweißpräparate zu mir.                                                                                                                                    |
| DBI-S10*  | Ich nehme täglich und in empfohlener Menge Multivitamin- und Mineralstoffpräparate zu mir.                                                                     | 5       | 4 | 3 | 2 | 1 | Ich nehme nie Multivitamin- und Mineralstoffpräparate zu mir.                                                                                                            |
| DBI-S11   | Ich esse täglich Gemüse.                                                                                                                                       | 5       | 4 | 3 | 2 | 1 | Ich esse nie Gemüse.                                                                                                                                                     |
| DBI-S12   | Ich esse täglich Obst.                                                                                                                                         | 5       | 4 | 3 | 2 | 1 | Ich esse nie Obst.                                                                                                                                                       |
| DBI-S13*  | Ich nutze immer pflanzliche Fette (z.B. Margarine und Öle auf Basis von Raps, Oliven, Sonnenblumen).                                                           | 5       | 4 | 3 | 2 | 1 | Ich nutze immer tierische Fette (Butter, Schmalz etc.).                                                                                                                  |
| DBI-S14   | Ich esse nie Süßigkeiten (z.B. Schokolade, Kekse, Gebäck).                                                                                                     | 5       | 4 | 3 | 2 | 1 | Ich esse täglich Süßigkeiten (z.B. Schokolade, Kekse, Gebäck).                                                                                                           |

|           |                                                                                                                                 |   |   |   |   |   |                                                                                                                             |
|-----------|---------------------------------------------------------------------------------------------------------------------------------|---|---|---|---|---|-----------------------------------------------------------------------------------------------------------------------------|
| DBI-S15*† | Ich trinke regelmäßig (täglich oder auch jedes Wochenende) Alkohol.                                                             | 1 | 2 | 3 | 4 | 5 | Ich trinke nie oder sehr selten (nur zu besonderen Anlässen) Alkohol.                                                       |
| DBI-S16   | Ich esse grundsätzlich Vollkornprodukte (z.B. Vollkornnudeln, Vollkornbrot).                                                    | 5 | 4 | 3 | 2 | 1 | Ich esse grundsätzlich Weißmehlprodukte (z.B. „herkömmliche“ Nudeln, Weißbrot/Graubrot).                                    |
| DBI-S17   | Ich trinke nie zucker-/ süßungsmittelhaltige Getränke (z.B. Säfte, Limonade, gesüßter Kaffee/Tee, Zero-Getränke).               | 5 | 4 | 3 | 2 | 1 | Ich trinke täglich zucker-/ süßungsmittelhaltige Getränke (z.B. Säfte, Limonade, gesüßter Kaffee/Tee, Zero-Getränke).       |
| DBI-S18†  | Ich esse täglich Lebensmittel mit vielen Kalorien, wie z.B. Smoothies, Eiscreme, Milchshakes, Säfte, Schokolade, Kuchen, Kekse. | 1 | 2 | 3 | 4 | 5 | Ich esse nie Lebensmittel mit vielen Kalorien, wie z.B. Smoothies, Eiscreme, Milchshakes, Säfte, Schokolade, Kuchen, Kekse. |
| DBI-S19   | Ich esse nie Fast-Food- und Fertigprodukte (z.B. Tiefkühlpizza, Mikrowellenfertiggerichte).                                     | 5 | 4 | 3 | 2 | 1 | Ich esse täglich Fast-Food- und Fertigprodukte (z.B. Tiefkühlpizza, Mikrowellenfertiggerichte).                             |

\* Items excluded for calculation of the DBI-S Score.

† Inverted items

**Table S2.** Items and Scoring of the Dietary Behaviour Inventory-Surgery (DBI-S) English items

| Item Code | Behavior A                                                                                                                                | Scoring |   |   |   |   | Behavior B                                                                                                                                               |
|-----------|-------------------------------------------------------------------------------------------------------------------------------------------|---------|---|---|---|---|----------------------------------------------------------------------------------------------------------------------------------------------------------|
| DBI-S1    | <i>I always eat peacefully, without getting distracted.</i>                                                                               | 5       | 4 | 3 | 2 | 1 | <i>While eating, I always distract myself with other things (e.g. watching TV, thinking about work, reading).</i>                                        |
| DBI-S2*   | <i>Throughout the day, I eat 3-4 small meals with longer breaks in between.</i>                                                           | 5       | 4 | 3 | 2 | 1 | <i>Throughout the day, I eat less frequently, but bigger meals.</i>                                                                                      |
| DBI-S3*   | <i>When I recognize satiety, I stop eating immediately.</i>                                                                               | 5       | 4 | 3 | 2 | 1 | <i>I continue eating, even when I am fed up.</i>                                                                                                         |
| DBI-S4    | <i>While eating, I always take my time.</i>                                                                                               | 5       | 4 | 3 | 2 | 1 | <i>I am always in a rush while eating.</i>                                                                                                               |
| DBI-S5    | <i>While eating, I take small bites, which I am chewing carefully.</i>                                                                    | 5       | 4 | 3 | 2 | 1 | <i>While eating, I take big bites, which I am chewing briefly.</i>                                                                                       |
| DBI-S6    | <i>I don't drink any beverages before (15 minutes) or after (30 minutes) meals.</i>                                                       | 5       | 4 | 3 | 2 | 1 | <i>I drink during mealtimes.</i>                                                                                                                         |
| DBI-S7    | <i>Throughout the day, I drink at least 1,5l (except alcoholic beverages, or beverages containing sugars/artificial sweeteners/soda).</i> | 5       | 4 | 3 | 2 | 1 | <i>Throughout the day, I drink significantly less than 1,5l (except alcoholic beverages, or beverages containing sugars/artificial sweeteners/soda).</i> |
| DBI-S8*   | <i>I eat protein-rich foods daily (soy, eggs, lentils, legumes, dairy, meat, fish).</i>                                                   | 5       | 4 | 3 | 2 | 1 | <i>I never eat protein-rich foods (soy, eggs, lentils, legumes, dairy, meat, fish).</i>                                                                  |
| DBI-S9    | <i>I take a high-quality protein supplement daily in the recommended dosage.</i>                                                          | 5       | 4 | 3 | 2 | 1 | <i>I never take protein supplements.</i>                                                                                                                 |
| DBI-S10*  | <i>I take vitamin and mineral supplements on a daily basis in the recommended dosage.</i>                                                 | 5       | 4 | 3 | 2 | 1 | <i>I never take vitamin or mineral supplements.</i>                                                                                                      |
| DBI-S11   | <i>I eat vegetables daily.</i>                                                                                                            | 5       | 4 | 3 | 2 | 1 | <i>I never eat vegetables.</i>                                                                                                                           |
| DBI-S12   | <i>I eat fruit daily.</i>                                                                                                                 | 5       | 4 | 3 | 2 | 1 | <i>I never eat fruit.</i>                                                                                                                                |
| DBI-S13*  | <i>I always use vegetable fats (e.g. margarine and oils based on rape, olives or sunflower).</i>                                          | 5       | 4 | 3 | 2 | 1 | <i>I always use animal fats (butter, lard).</i>                                                                                                          |
| DBI-S14   | <i>I never eat sweets (e.g. chocolate, cookies, pastry).</i>                                                                              | 5       | 4 | 3 | 2 | 1 | <i>I eat sweets daily (e.g. chocolate, cookies, pastry).</i>                                                                                             |

|           |                                                                                                                                    |   |   |   |   |   |                                                                                                                                             |
|-----------|------------------------------------------------------------------------------------------------------------------------------------|---|---|---|---|---|---------------------------------------------------------------------------------------------------------------------------------------------|
| DBI-S15*† | <i>I drink alcohol regularly (daily or every weekend).</i>                                                                         | 1 | 2 | 3 | 4 | 5 | <i>I never or rarely (only at special occasions) drink alcohol.</i>                                                                         |
| DBI-S16   | <i>I eat whole-grain products on principle (e.g. bread, pasta).</i>                                                                | 5 | 4 | 3 | 2 | 1 | <i>I eat white flour products on principle (e.g. bread, pasta).</i>                                                                         |
| DBI-S17   | <i>I never drink beverages, which contain sugar or artificial sweeteners (e.g. soda, lemonade, sweetened coffee, diet drinks).</i> | 5 | 4 | 3 | 2 | 1 | <i>I drink beverages that contain sugar or artificial sweeteners on a daily basis (e.g. soda, lemonade, sweetened coffee, diet drinks).</i> |
| DBI-S18†  | <i>I eat high calorie foods daily (e.g. smoothies, ice cream, milkshakes, juices, chocolate, cake, cookies).</i>                   | 1 | 2 | 3 | 4 | 5 | <i>I never eat high calorie foods (e.g. smoothies, ice cream, milkshakes, juices, chocolate, cake, cookies).</i>                            |
| DBI-S19   | <i>I never eat fast food or instant meals (e.g. frozen pizza, microwave instant meals).</i>                                        | 5 | 4 | 3 | 2 | 1 | <i>I eat fast food or instant meals daily (e.g. frozen pizza, microwave instant meals).</i>                                                 |

\* Items excluded for calculation of the DBI-S Score.

† Inverted items

Note: This translation is only for publication purpose. No validation of the translated items was performed.

**Table S3.** Results of the post hoc test (Hochberg's GT2) regarding the relation between the DBI-S Score and time since bariatric surgery

| <i>Compared groups</i>                                    | <i>Mean difference</i> | <i>Standard Error</i> | <i>P value</i>    |
|-----------------------------------------------------------|------------------------|-----------------------|-------------------|
| <i>Less than 6 months<br/>to<br/>Less than 12 months</i>  | <i>3.98</i>            | <i>0.94</i>           | <i>&lt; 0.001</i> |
| <i>Less than 6 months<br/>to<br/>Less than 24 months</i>  | <i>6.30</i>            | <i>0.97</i>           | <i>&lt; 0.001</i> |
| <i>Less than 6 months<br/>to<br/>More than 24 months</i>  | <i>8.77</i>            | <i>0.77</i>           | <i>&lt; 0.001</i> |
| <i>Less than 12 months<br/>to<br/>Less than 24 months</i> | <i>2.33</i>            | <i>1.06</i>           | <i>0.16</i>       |
| <i>Less than 12 months<br/>to<br/>More than 24 months</i> | <i>4.79</i>            | <i>0.88</i>           | <i>&lt; 0.001</i> |
| <i>Less than 24 months<br/>to<br/>More than 24 months</i> | <i>2.47</i>            | <i>0.91</i>           | <i>0.035</i>      |

**Figure S1.** Correlation plots to visualize relationships between the DBI-S Score and each validation variable by the four groups of time since bariatric surgery

Group definition:        1 = Less than 6 months  
                                 2 = Less than 12 months  
                                 3 = Less than 24 months  
                                 4 = More than 24 months

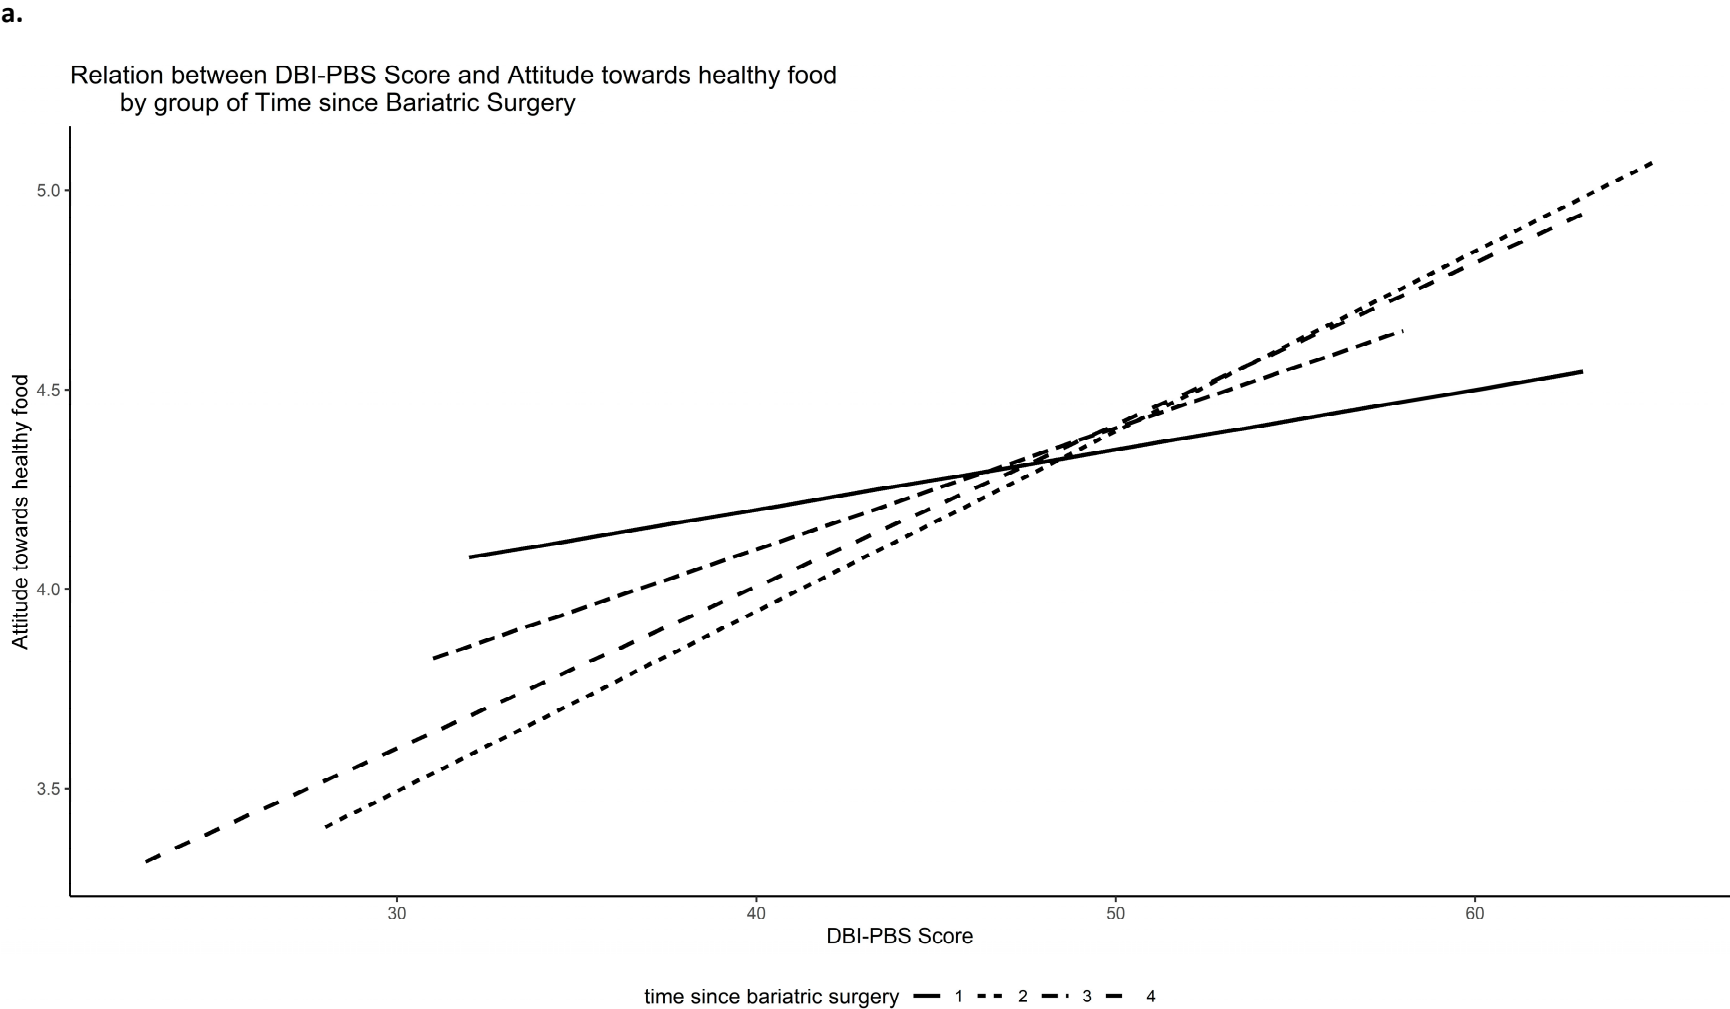

b.

Relation between DBI-PBS Score and Impulsivity  
by group of Time since Bariatric Surgery

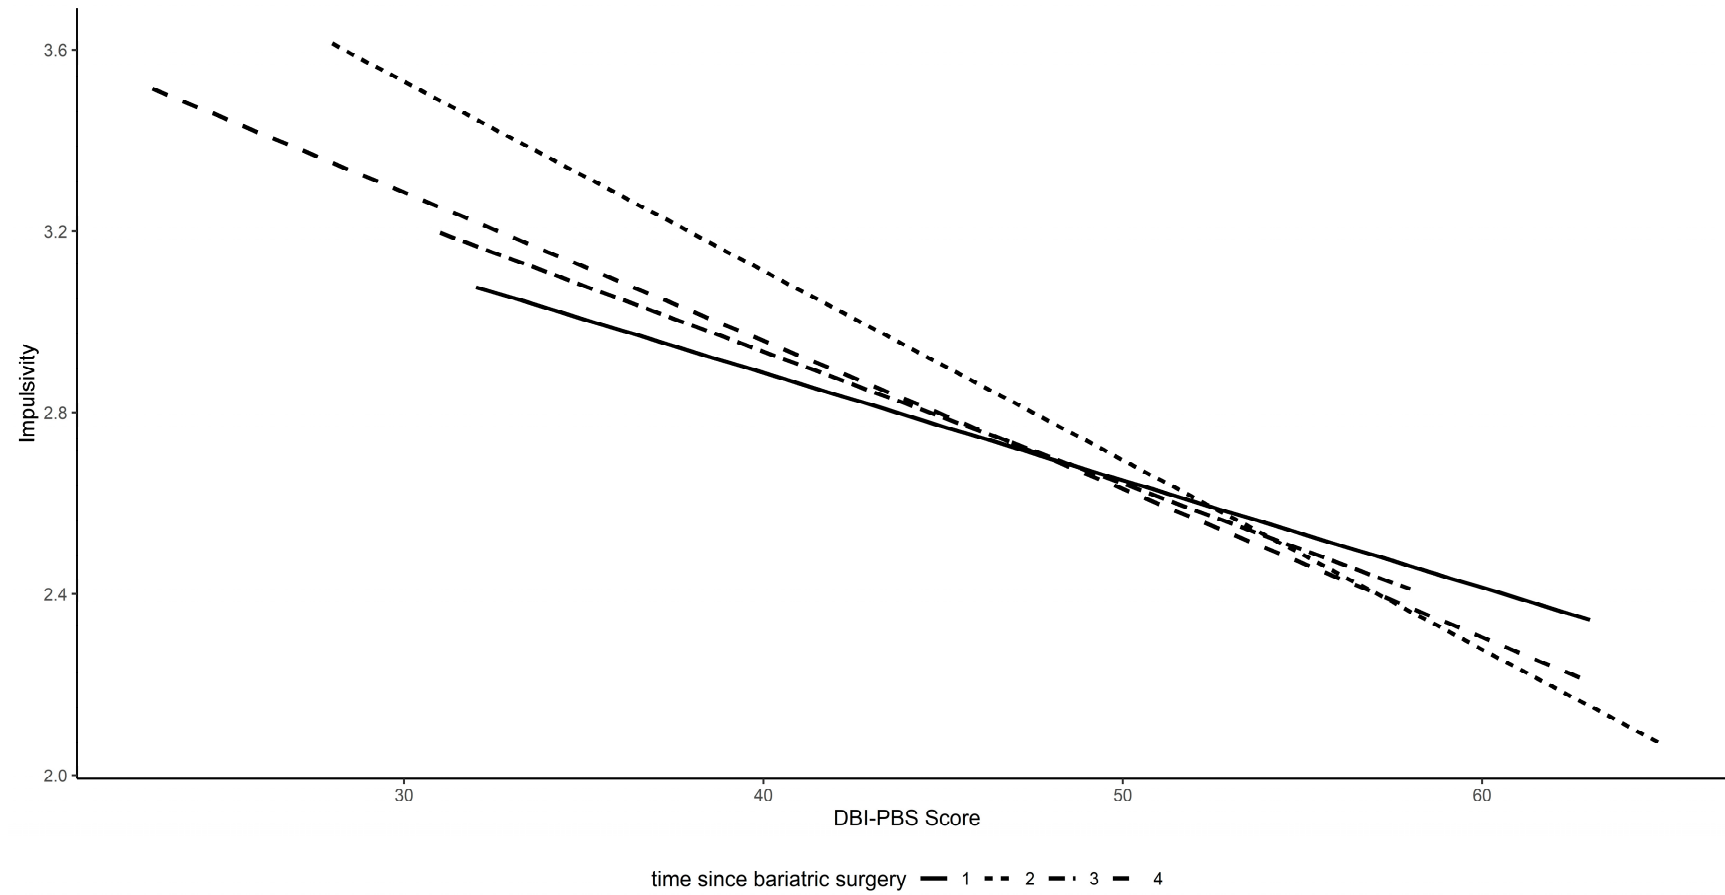

c.

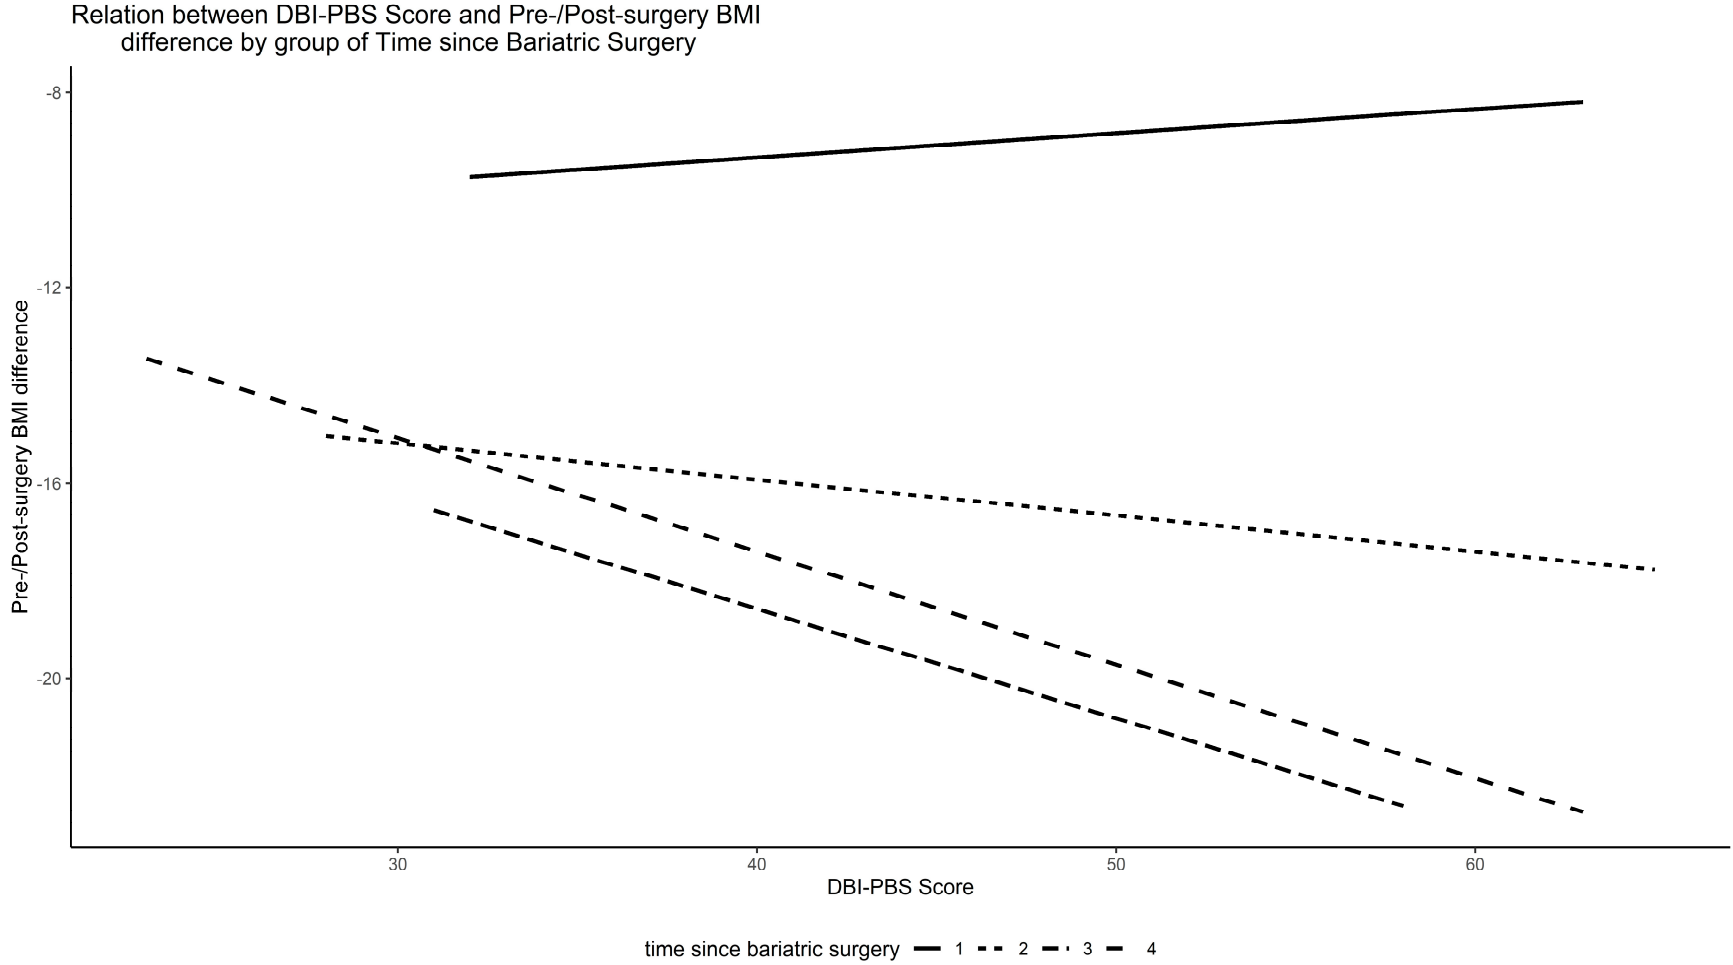



d.

Relation between DBI-PBS Score and Pre-/Post-surgery body weight difference by group of Time since Bariatric Surgery

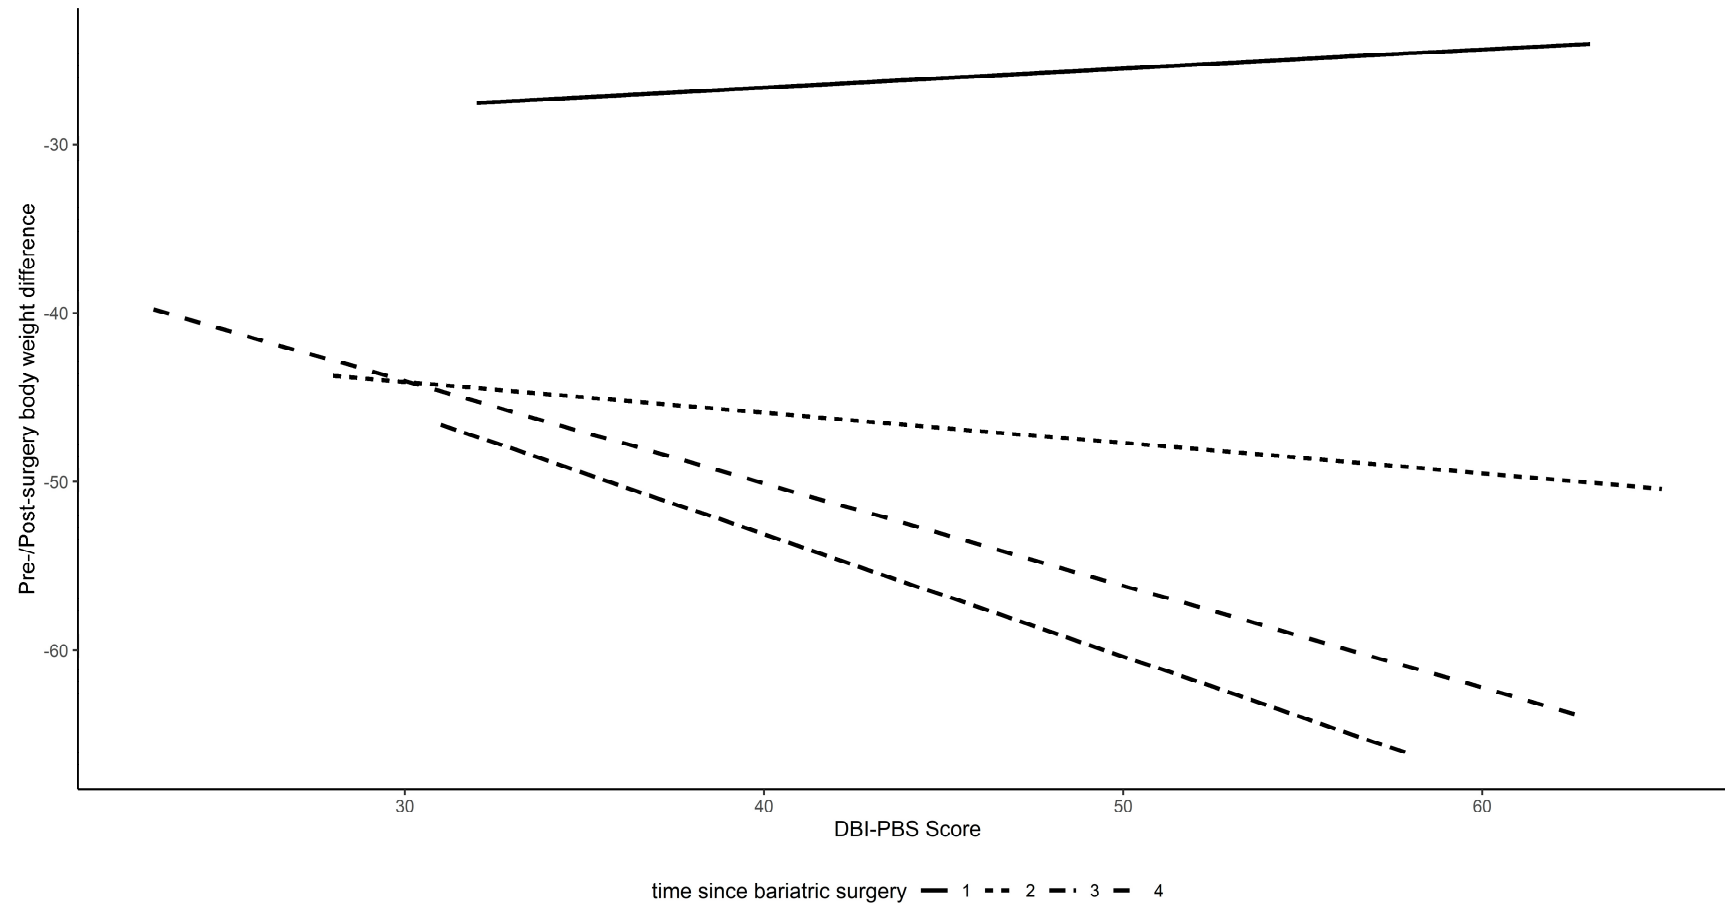

e.

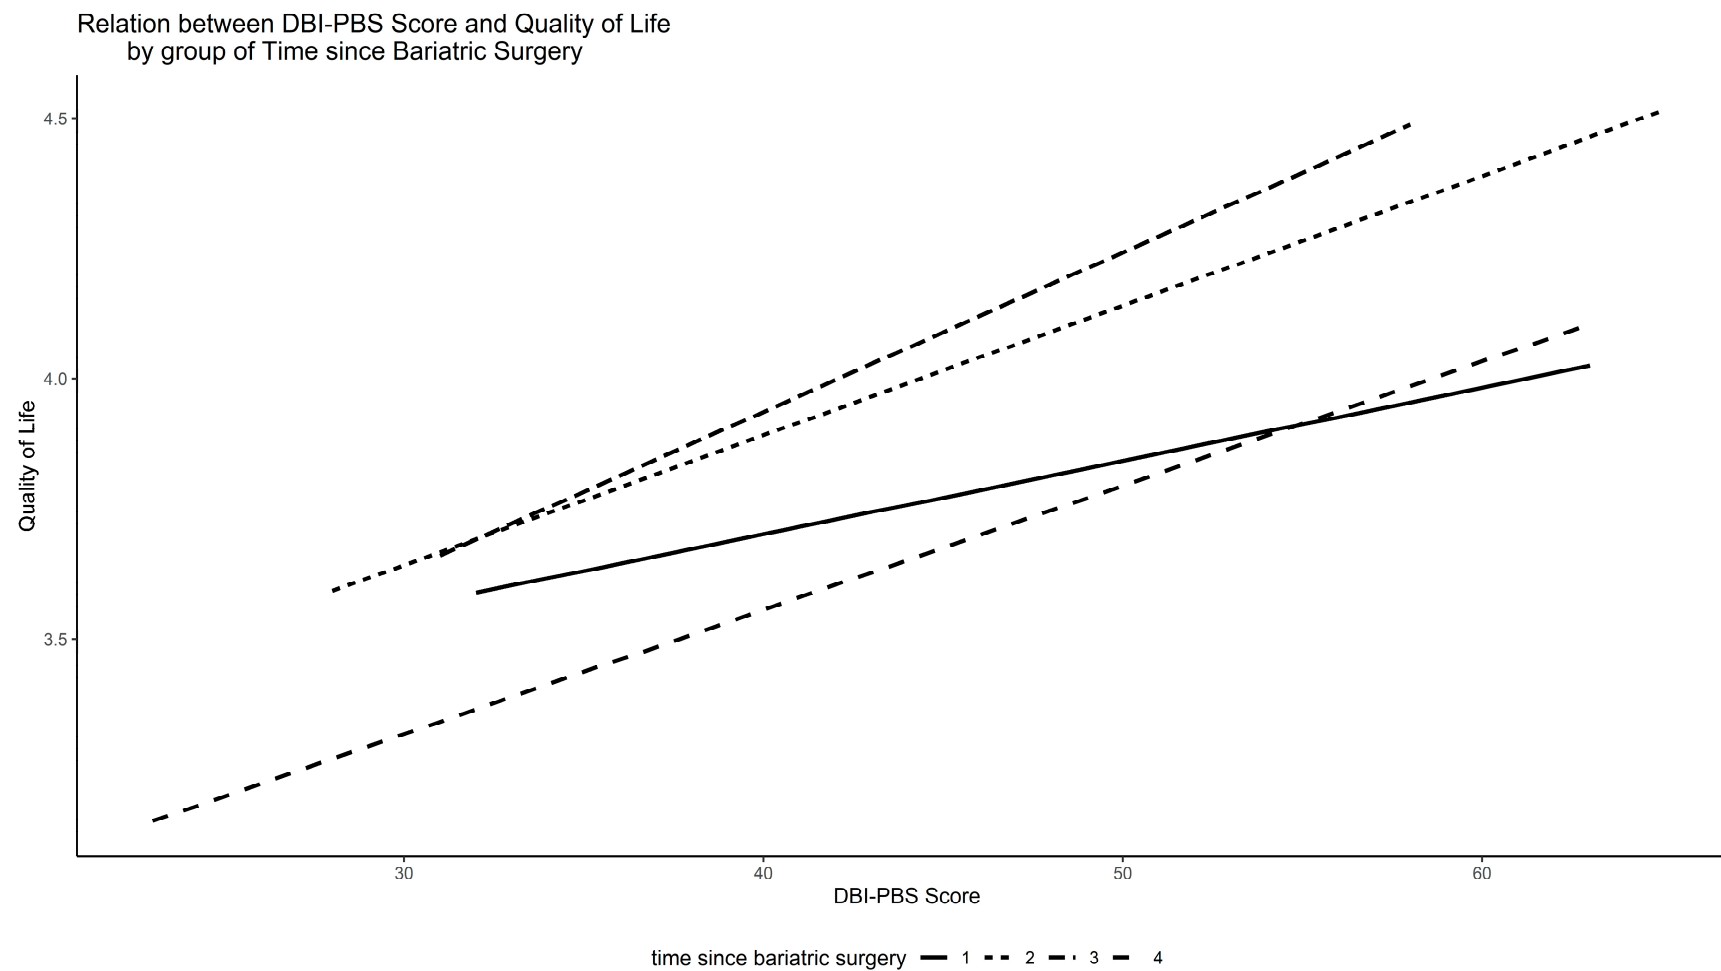

Note Figure S1a-e: DBI-PBS is equivalent to DBI-S
